# 1 Barnaba: Software for Analysis of 2 Nucleic Acids Structures and 3 Trajectories

4 **Sandro Bottaro**<sup>1,2\*</sup>, **Giovanni Bussi**<sup>2\*</sup>, **Giovanni Pinamonti**<sup>2,3</sup>, **Sabine**  
5 **ReiBer**<sup>2</sup>, **Wouter Boomsma**<sup>4</sup>, **Kresten Lindorff-Larsen**<sup>1</sup>

**\*For correspondence:**

[sandro.bottaro@bio.ku.dk](mailto:sandro.bottaro@bio.ku.dk)  
(SB); [bussi@sissa.it](mailto:bussi@sissa.it) (GB)

6 <sup>1</sup>Structural Biology and NMR Laboratory and Linderstrøm-Lang Centre for  
7 Protein Science, Department of Biology, University of Copenhagen,  
8 Copenhagen, Denmark; <sup>2</sup>International School for Advanced Studies,  
9 Trieste, Italy; <sup>3</sup>Department of Mathematics and Computer Science, Freie  
10 Universität, Berlin, Germany; <sup>4</sup>Department of Computer Science,  
11 University of Copenhagen, Copenhagen, Denmark

---

12

13 **Abstract** RNA molecules are highly dynamic systems characterized by a  
14 complex interplay between sequence, structure, dynamics, and function.  
15 Molecular simulations can potentially provide powerful insights into the nature of  
16 these relationships. The analysis of structures and molecular trajectories of  
17 nucleic acids can be non-trivial because it requires processing very  
18 high-dimensional data that are not easy to visualize and interpret.  
19 Here we introduce Barnaba, a Python library aimed at facilitating the analysis of  
20 nucleic acids structures and molecular simulations. The software consists of a  
21 variety of analysis tools that allow the user to i) calculate distances between  
22 three-dimensional structures using different metrics, ii) back-calculate  
23 experimental data from three-dimensional structures, iii) perform cluster analysis  
24 and dimensionality reductions, iv) search three-dimensional motifs in PDB  
25 structures and trajectories and v) construct elastic network models (ENM) for  
26 nucleic acids and nucleic acids-protein complexes.  
27 In addition, Barnaba makes it possible to calculate torsion angles, pucker  
28 conformations and to detect base-pairing/base-stacking interactions. Barnaba  
29 produces graphics that conveniently visualize both extended secondary structure  
30 and dynamics for a set of molecular conformations. Barnaba is available as a  
31 command-line tool as well as a library, and supports a variety of file formats such  
32 as PDB, dcd and xtc files. Source code, documentation and examples are freely  
33 available at <https://github.com/srnas/barnaba> under GNU GPLv3 license.

34

---

## 35 Introduction

36 Despite their simple four-letters alphabet, RNA molecules can adopt amazingly  
37 complex three-dimensional architectures. RNA structure is often described in  
38 terms of few, simple degrees of freedom such as backbone torsion angles,  
39 sugar puckering, base-base interactions, and helical parameters *Dickerson (1989);*  
40 *Richardson et al. (2008)*. Given a known three-dimensional structure, the cal-  
41 culation of these properties can be performed using available tools such as  
42 MC-annotate *Gendron et al. (2001)*, 3DNA *Lu and Olson (2008)*, fr3D *Sarver et al.*  
43 *(2008)* or DSSR *Lu et al. (2015)*. These software packages make it possible to  
44 calculate a variety of structural properties, but are less suitable for analyzing and  
45 comparing large numbers of structures.

46 The lack of large-scale analysis tools is critical when considering that many  
47 RNA molecules are not static, but highly dynamic entities, and multiple confor-  
48 mations are required to describe their properties. In molecular dynamics (MD)  
49 simulations *Šponer et al. (2018)*, for example, it is often necessary to analyze  
50 several hundreds of thousands of structures. The analysis and comparison of  
51 results from structure-prediction algorithms poses similar challenges *Dawson and*  
52 *Bujnicki (2016); Miao et al. (2017)*. In order to rationalize and generate scientific  
53 insights, it is therefore fundamental to employ specific analysis and visualization  
54 tools that can handle such highly-dimensional data. This need has been long  
55 recognized in the field of protein simulations, leading to the development of  
56 several software packages for the analysis of MD trajectories *Michaud-Agrawal*  
57 *et al. (2011); McGibbon et al. (2015); Tiberti et al. (2015)*. While these software  
58 can be in principle used to analyze generic simulations, they do not support the  
59 calculation of nucleic-acids-specific quantities out of the box. Notable exceptions  
60 are CPPTRAJ *Roe and Cheatham III (2013)*, and the driver tool in PLUMED *Tribello*  
61 *et al. (2014)*, that support the calculation of nucleic acids structural properties,  
62 among other features.

63 A limited number of software packages have been developed with the main  
64 purpose of analyzing simulations of nucleic acids. Curves+ *Lavery et al. (2009)*  
65 calculates parameters in DNA/RNA double helices as well as torsion backbone  
66 angles. *do<sub>x3dna</sub>* *Kumar and Grubmüller (2015)* extends the capability of the 3DNA  
67 package to analyze few selected quantities from GROMACS *Abraham et al. (2015)*  
68 MD trajectories. The detection of hydrogen bonds/stacking in simulations and the  
69 identification of motifs such as helices, junctions, loops, etc. can be performed  
70 using the Motif Identifier for Nucleic acids Trajectory (MINT) software *Górska et al.*  
71 *(2015)*.

72 Here we present Barnaba, a Python library to analyze nucleic acids structures  
73 and trajectories. The library contains routines to calculate various structural pa-  
74 rameters (e.g. distances, torsion angles, base-pair and base-stacking detection), to

75 perform dimensionality reduction and clustering, to back-calculate experimental  
76 quantities from structures and to construct elastic network models. Barnaba  
77 utilizes the capabilities of MDTraj *McGibbon et al. (2015)* for reading/writing tra-  
78 jectory files, and thus supports many different formats, including PDB, dcd, xtc,  
79 and trr.

80 In this paper we show the capabilities of Barnaba by analyzing a long MD  
81 simulation of an RNA stem-loop structure. We first calculate distances from a  
82 reference frame. Second, we consider a subset of dihedral angles and compare  
83  $^3J$  scalar couplings calculated from simulations with nuclear magnetic resonance  
84 (NMR) data. We then perform a cluster analysis of the trajectory, identifying  
85 a number of clusters that are visualized using a dynamic secondary structure  
86 representation. Finally, we search for structural motifs similar to cluster centroids  
87 in the entire protein data bank (PDB) database. In addition, we show how to  
88 construct an elastic network model (ENM) of RNA molecules and protein-nucleic  
89 acid complexes with Barnaba, and how to use it to estimate RNA local fluctuations.

## 90 Results

91 We present the different features of Barnaba by analyzing a 180 $\mu$ s long simulation  
92 of an RNA 14-mers with sequence GGCACUUCGGUGCC performed by Tan et al. *Tan*  
93 *et al. (2018)* using a simulated tempering protocol where the temperature is used  
94 as a dynamic variable to enhance sampling. Experimentally, this sequence is  
95 known to form an A-form stem composed by 5 consecutive Watson-Crick base  
96 pairs, capped by a UUCG tetraloop (Fig. 1A).

### 97 RMSD, eRMSD calculation and detection of base-base interactions.

98 First, we calculate the distance of each frame in the simulation from the reference  
99 experimental structure (PDB code 2KOC *Nozinovic et al. (2010)*). Fig.1B shows  
100 the time series of heavy-atom root mean squared distance (RMSD) after optimal  
101 superposition *Kabsch (1976)*. During this simulation, multiple folding events occur:  
102 In line with previous analyses *Tan et al. (2018)* we thus observe both structures  
103 close to the reference as well as unfolded/misfolded ones.

104 We identify the base-base interactions in each frame using the annotation  
105 functionality in Barnaba (see Methods). Structures where the stem is completely  
106 formed together with the native trans sugar-Watson (tSW) interaction between  
107 U6-G9 in the loop are shown in red. Blue points indicate structures in which all  
108 base pairs in the stem, but not in the loop, are present. All the other structures are  
109 colored in gray. From the histogram in Fig. 1B it can be seen that RMSD < 0.23nm  
110 roughly corresponds to native-like structures. A second sharp peak around 0.3nm  
111 corresponds to structures in which only the stem is correctly formed. All other  
112 conformations have RMSD larger than 0.6nm.

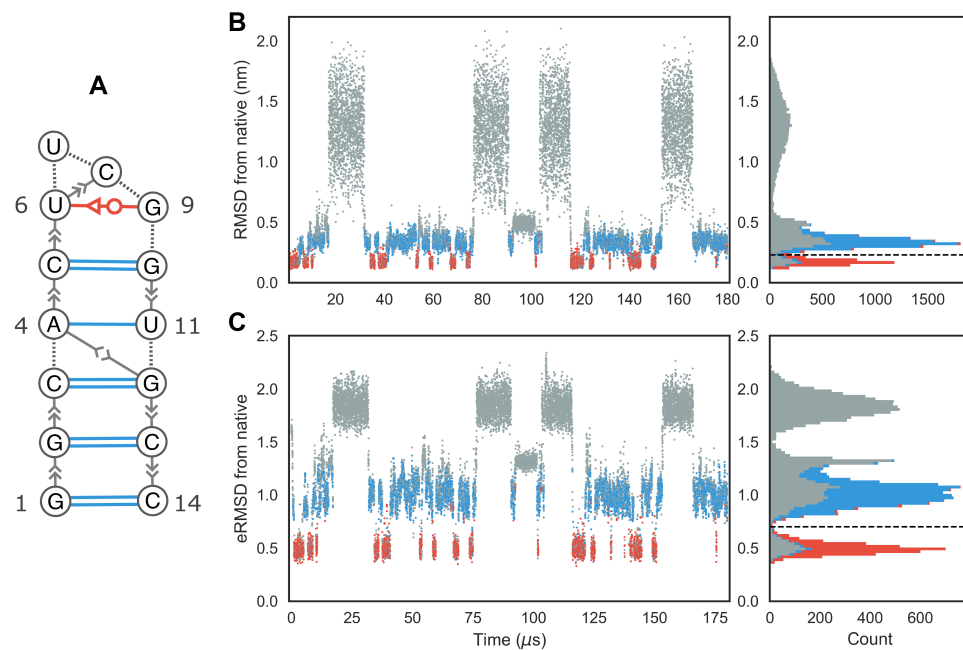

**Figure 1.** **A)** Extended secondary structure representation of the UUCG stem-loop. Watson-Crick base pairs are shown in blue, trans Sugar-Watson base pair between U6 and G9 is shown in red. **B)** RMSD from native over time of the UUCG simulation. The corresponding histogram is shown in the right panel. The dashed line at RMSD=0.23nm separates native-like from non-native-like structures. The colors indicate the presence of native base-base interactions, as shown in the secondary structure representation. Structures where all Watson-Crick interactions in the stem and the trans Sugar-Watson base pair in loop is formed are shown in red. Blue indicates structures where only the stem is formed. All other conformations are shown in gray. **C)** eRMSD from native structure over time. Color scheme is identical to panel **B**. Dashed line at eRMSD=0.7 separates native-like from non-native conformations.

113 One of the feature of Barnaba is the possibility to calculate the eRMSD **Bottaro**  
114 **et al. (2014)**. The eRMSD only considers the relative arrangements between nu-  
115 cleobases in a molecule, and quantifies the differences in the interaction network  
116 between two structures. In this perspective, eRMSD is similar to the Interaction  
117 Fidelity Network **Parisien et al. (2009)** that quantifies the discrepancy in the set of  
118 base-pairs and base-stacking interactions. The eRMSD, however, is a continuous,  
119 symmetric, positive definite metric distance that satisfies the triangular inequality.  
120 Additionally, it does not require detection of the interactions (annotation) and is  
121 hence particularly well suited for analyzing MD trajectories and unstructured RNA  
122 molecules. Fig.1C shows the eRMSD from native for the UUCG simulation. We  
123 notice that, similarly to the RMSD case, the histogram displays three main peaks.  
124 In this case the correspondence between peaks and structures can be readily  
125 identified: when  $eRMSD < 0.7$  native stem and loop are formed, if  $0.7 < eRMSD < 1.3$ ,  
126 stem is formed but the loop is in a non-native configuration. Other structures  
127 typically have  $eRMSD > 1.3$ . We observe that the separation between the two main  
128 peaks (native structure, red, and native stem, blue) is sharper in Fig.1C, confirming  
129 that eRMSD is more suitable than RMSD to distinguish structures with different  
130 base pairings **Bottaro et al. (2014)**.

131 Note that a significant number of low-RMSD/eRMSD structures lack one or  
132 more native base-pair interactions, and are therefore shown in gray. This is  
133 because the detection of base-base interactions critically depends on a set of  
134 geometrical parameters (e.g. distance, base-base orientation, etc.) that were  
135 calibrated on high-resolution structures. The criteria used in Barnaba (as well as  
136 the ones employed in other annotation tools) may not always be accurate when  
137 considering intermediate states and partially formed interactions that are often  
138 observed in molecular simulations **Lemieux and Major (2002)**.

### 139 **Torsion angle and 3J scalar coupling calculations**

140 Another important class of structural parameters is torsion angles. Similarly to  
141 other software, Barnaba contains routines to calculate backbone torsion angles  
142 ( $\alpha, \beta, \gamma, \delta, \epsilon, \zeta$ ), the glycosidic angle  $\chi$ , and the pseudorotation sugar parameters  
143 **Altona and Sundaralingam (1972)**.

144 In Fig. 2, left panels we plot the probability distributions of four angles ( $\beta, \gamma, \delta$   
145 and  $\epsilon$ ) for three different residues: U6, U7, and G9. We can see from the dis-  
146 tribution of  $\gamma$  angles that U6 and U7 mainly populate the *gauche*<sup>+</sup> rotameric  
147 state ( $0^\circ < \gamma \leq 120^\circ$ ), while G9 significantly populates the *trans* state as well  
148 ( $120^\circ < \gamma \leq 240^\circ$ ). Different rotameric states can be also seen from the distribution  
149 of  $\delta$  angles (C2'/C3'-endo) and  $\epsilon$ , that is related to BI/BII states. Here, we consider  
150 the same trajectory of the UUCG tetraloops described above and removed all the  
151 unfolded structures, i.e. structures with eRMSD from native larger than 1.5 ( $\approx$   
152 6000 out of 20000), because we below compare to experiments under conditions

153 where these are absent.

154 In this example we chose these specific torsion angles because their distribu-  
155 tion is related to available  $^3J$  couplings experimental data from nuclear magnetic  
156 resonance (NMR) spectroscopy. The magnitude of  $^3J$  coupling depends on the dis-  
157 tance between atoms connected by three bonds, and thus on the corresponding  
158 dihedral angle distribution. The dependence between angle  $\theta$  and coupling  $^3J$   
159 can be calculated via Karplus equations  $^3J = A \cos^2(\theta + \phi) + B \cos(\theta + \phi) + C$ , where  
160  $A, B, C$  are empirical parameters. Couplings corresponding to different angles can  
161 be calculated with Barnaba. H1'-H2', H2'-H3', H3'-H4' (sugar conformation), H5'-P,  
162 H5''-P, C4-P ( $\beta$ ), H4'-H5', H4'-H5'' ( $\gamma$ ), H3-P(+1), C4-P(+1) ( $\epsilon$ ), H1'-C8/C6, and H1'-C4/C2  
163 ( $\chi$ ). The complete list of Karplus parameters is reported in the Methods section,  
164 and may be changed within Barnaba.

165 Fig. 2, right panels, show the back-calculated average  $^3J$  couplings and the  
166 corresponding experimental value reported in *Nozinovic et al. (2010)*. Note that  
167 in some cases experiments and simulations do not agree: this is because the  
168 simulation was performed at different temperatures using a simulated tempering  
169 protocol, and therefore the comparison between simulations and experiments is  
170 here made for illustrative purposes only. Significant discrepancies could originate  
171 from errors introduced by the Karplus equations, that can be as large as 2Hz  
172 *Bottaro et al. (2018)*.

### 173 Cluster analysis

174 The structures within a trajectory can be grouped into clusters of mutually similar  
175 conformations, to understand which different states are visited and how often.  
176 For clustering we use the DBSCAN *Ester et al. (1996)* algorithm with  $\epsilon = 0.45$  and  
177 min samples=70 *Bottaro and Lindorff-Larsen (2017)*. As in the previous example,  
178 structures with eRMSD > 1.5 from native are discarded. Figure 3A shows the  
179 trajectory projected onto the first two components of a principal component  
180 analysis done on the collection of G-vectors *Bottaro and Lindorff-Larsen (2017)*.  
181 Circles show the resulting 9 clusters, whose radius is proportional to the square  
182 root of their size. The 5500 structures (40%) that were not assigned to any cluster  
183 are shown as gray dots. For each cluster we identify its centroid, here defined as  
184 the structure with the lowest average distance from all other cluster members.

185 Ideally, clusters should be compact enough so that the centroid can be consid-  
186 ered as a representative structure. This information is shown in the box-plot in Fig.  
187 3B, that reports the distances (eRMSD and RMSD, as labeled) between centroids  
188 and cluster members. At the same time, structures within clusters are not all  
189 identical to one another. In order to visualize the intra-cluster variability we have  
190 found it useful to introduce a “dynamic secondary structure” representation. In  
191 essence, we detect base-stacking/base-pair interactions in all structures within a  
192 cluster, and calculate the fraction of frames in which each interaction is present.

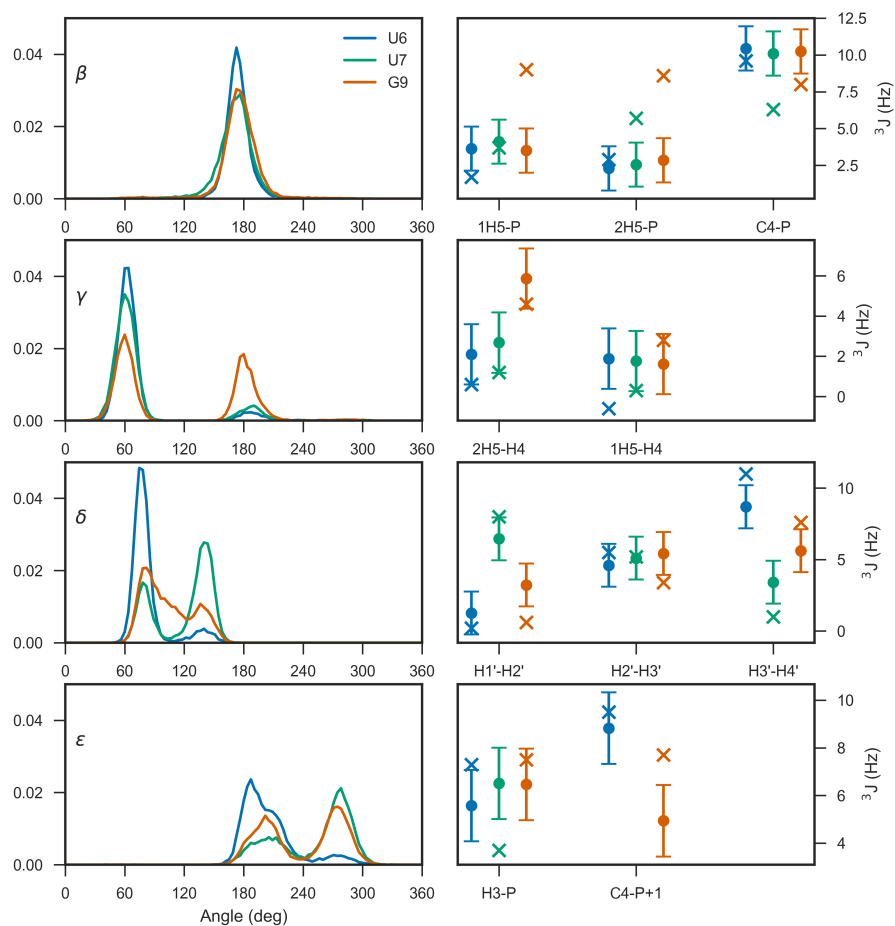

**Figure 2.** Left panels: Torsion angle distribution for  $\beta, \gamma, \delta$  and  $\epsilon$  in residues U6, U7, and G9. Right panels show the experimental  $^3J$  couplings (crosses) and the calculated value from simulation (dots). The error bars indicate the standard error of the mean calculated over 4 blocks.

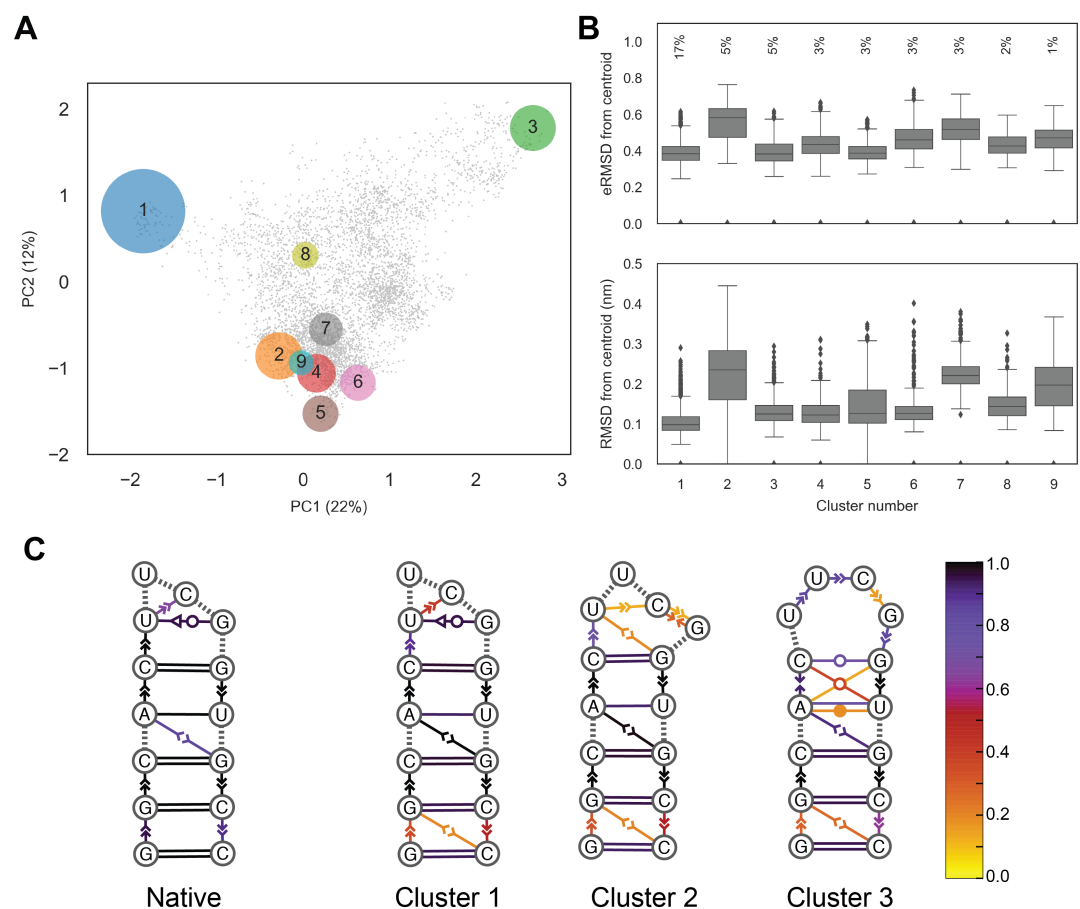

**Figure 3.** Example of a cluster analysis on the UUCG stem-loop trajectory. **A**) principal component analysis on the collection of G-vectors *Bottaro and Lindorff-Larsen (2017)*. Each circle corresponds to a cluster, gray dots show unassigned structures. Circles are centered in the centroid positions, and the radii are proportional to the square root of the population. The percentage of explained variance of the first two components is indicated on the axes. **B**) Box-plots reporting eRMSD (top) and RMSD (bottom) from cluster centroids. Lower/upper hinges correspond to the first and third quartiles, while whiskers indicate lowest/highest data within 1.5 interquartile range. Data beyond the end of the whiskers are shown individually. The percentages indicate the cluster population. **C**) Dynamic secondary structure representation of the 20 native NMR conformers (PDB 2KOC) and of the first three clusters. The extended secondary structure annotation follows the Leontis-Westhof classification. The color scheme shows the fraction of frames within a cluster for which the interaction is formed.



193 The population of each interaction is shown by coloring the extended secondary  
194 structure representation (Fig.3C). This representation has some analogy with the  
195 “dot plot” representation used to display secondary structure ensembles obtained  
196 using nearest neighbor models, that reports the predicted probability of individual  
197 base pairs *Jacobson and Zuker (1993)*. We can see that the first three clusters  
198 correspond to three different tetraloop structures. In cluster 1, the U6-G9 tSW  
199 base pair is present, together with the U6-C8 stacking typical of the native UUCG  
200 tetraloop structure. In cluster 2, no U6-G9 base pair is present, while in cluster 3  
201 we observe stacking between U6-U7-C8-G9, as also described in the next section.  
202 In all clusters the population of the terminal base pairs and stacking is lower than  
203 one, indicating the presence of base fraying.

204 In our experience, cluster analysis is useful to understand and visualize quali-  
205 tatively the different type of structures in a simulation. In many practical cases,  
206 however, the number of clusters and their population may differ depending on  
207 the employed clustering algorithm and associated parameters. Clustering may  
208 not even be meaningful when considering highly unstructured systems such as  
209 long single-stranded nucleic acids lacking secondary structures *Chen et al. (2012)*.

## 210 **Motif search**

211 Barnaba can be used to search for structural motifs in a PDB file or trajectory  
212 using the eRMSD distance. In the following example, we illustrate this feature  
213 by taking the centroids of the first three clusters described above and search for  
214 similar structures within the PDB database. In order to focus on the loop structure,  
215 rather than on stem variability, we consider the tetraloop and the two closing  
216 base pairs for the search (residues 4-11 in Fig.1A). The search is performed  
217 against all RNA-containing structures in the PDB database (retrieved May 4th,  
218 2018, resolution 3.5Å or better). The database considered here consists of 3067  
219 X-ray, 652 NMR and 177 cryo electron-microscopy (EM) structures. Note that the  
220 search is purely based on the geometrical arrangement of nucleobases, without  
221 restriction on the sequence, a particular feature that is also enabled by the use of  
222 eRMSD.

223 Figure 4 shows the cluster centroids (gray) and the closest motif match, i.e. the  
224 lowest eRMSD substructure in the PDB database (orange). The eRMSD between  
225 the cluster centroid and the best match are indicated, together with the associated  
226 PDB code. Centroid 1 corresponds to the canonical UUCG tetraloop structure, with  
227 the signature tSW interaction between U6-G9 and G9 in syn conformation. Note  
228 that the eRMSD between centroid and best match is small (0.25), indicating that  
229 simulated and experimental structures are highly similar. Cluster 2 corresponds  
230 to a structure in which the stem is formed, C8 is stacked on top of U6 and G9 is  
231 bulged out. Centroid 3 features four consecutive stacking between U6-U7-C8-G9.  
232 Note that this latter structure is remarkably similar to the 4-stack loop described

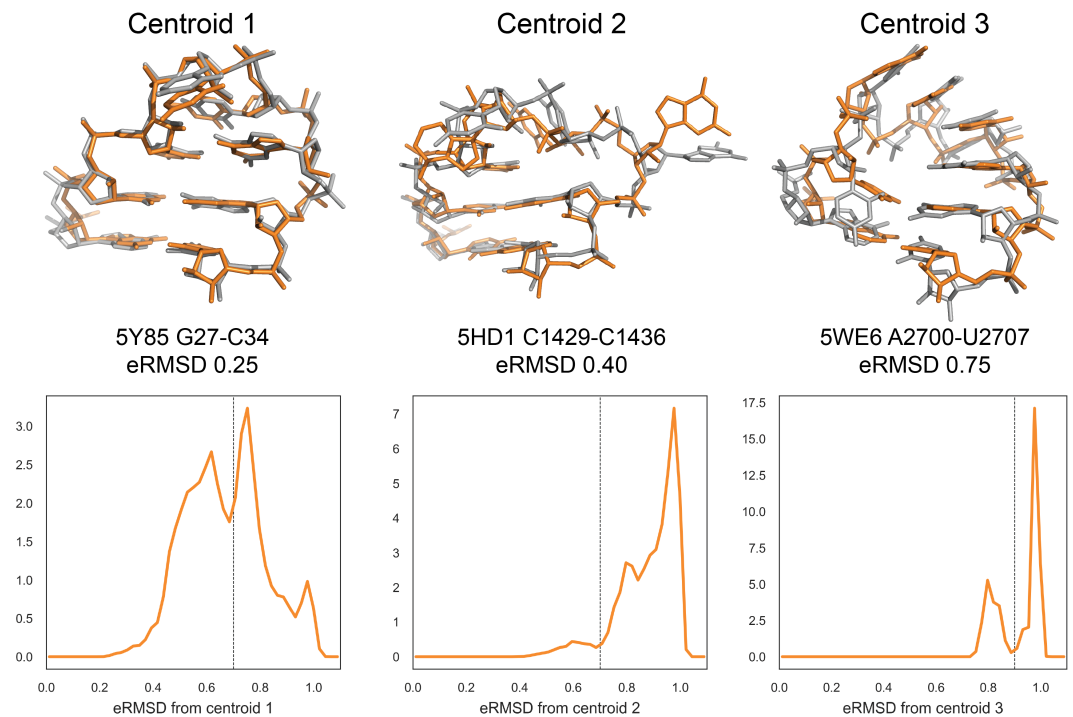

**Figure 4.** Motif search in PDB database. Top panels: centroids of the first three clusters (in gray) superimposed on the closest structures from the PDB database (orange). eRMSD between centroid and the best match are indicated, together with the associated PDB code. Bottom panels: eRMSD distribution between centroid and substructures from PDB database. Note that different distributions are obtained for different clusters, meaning that the eRMSD threshold varies depending on the motif. Distances larger than eRMSD=1 are not reported. The eRMSD threshold at 0.7 (centroids 1,2) and 0.9 (centroid 3) is indicated as a dashed line.

233 in *Bottaro and Lindorff-Larsen (2017)*.

234 As a rule of thumb, we consider as significant matches structures below 0.7  
235 eRMSD, but there are cases in which it is worth considering structures in the  
236 0.7-1.0 eRMSD range as well. More generally, it is useful to consider the histogram  
237 of all fragments with eRMSD below 1, as shown in Fig. 4, bottom panels. This type  
238 of analysis makes it possible to identify a good threshold value, in correspondence  
239 to minima in the probability distributions. For example, there are no structures  
240 in the PDB with eRMSD lower than 0.7 for centroid 3. In this case, a value of 0.9  
241 should be used instead.

242 In this example we performed a simple search of a structure from simulation  
243 against experimentally-derived structures downloaded from the PDB database.  
244 In Barnaba, any arbitrary motif can be used as a query by providing a coordinate  
245 file with at least the position of C2,C4 and C6 atoms for each nucleotide. Searches  
246 with more complex motifs composed by two strands (e.g. K-turns, sarcin-ricin  
247 motifs, etc.) are also possible. Additionally, Barnaba allows for inserted bases,  
248 thereby identifying structural motifs with one or more bulged-out bases.

## 249 **Elastic Network Models**

250 Elastic Network Models (ENMs) are minimal computational models able to capture  
251 the dynamics of macromolecules at a small computational cost. They assume that  
252 the system can be represented as a set of beads connected by harmonic springs,  
253 each having rest length equal to the distance between the two beads it connects,  
254 in a reference structure (usually, an experimental structure from the PDB). First  
255 introduced to analyze protein dynamics *Tirion (1996)*, ENMs are also applicable  
256 to structured RNA molecules *Bahar and Jernigan (1998)*; *Setny and Zacharias*  
257 *(2013)*; *Zimmermann and Jernigan (2014)*. Barnaba contains routines to construct  
258 ENM of nucleic acids and proteins, and, as unique feature, makes it possible  
259 to calculate fluctuations between consecutive C2-C2 atoms. In a previous work  
260 *Pinamonti et al. (2015)*, we have shown this quantity to correlate with flexibility  
261 measurements performed with selective 2-hydroxyl acylation analyzed by primer  
262 extension (SHAPE) experiments *Merino et al. (2005)*. Here, we show an example  
263 of ENM analysis on two RNA molecules: the 174-nucleotide sensing domain of  
264 the *Thermotoga maritima* lysine riboswitch (PDB ID: 3DIG), and the *Escherichia*  
265 *coli* 5S rRNA (PDB ID: 1C2X). We construct an all-atom ENM (AA-ENM), where each  
266 heavy atom is a bead, together with a cutoff radius of 7 Å. In figure 5 we show  
267 the flexibility of the RNA molecules as predicted by the ENM (black), that can be  
268 qualitatively compared with the measured SHAPE reactivity *Hajdin et al. (2013)*  
269 (orange).

270 The implementation of the ENM in Barnaba employs the sparse matrix pack-  
271 age available in Scipy, that allows for significant speed-ups compared to the  
272 dense-matrix implementation. Fig. 6 shows the execution time for constructing

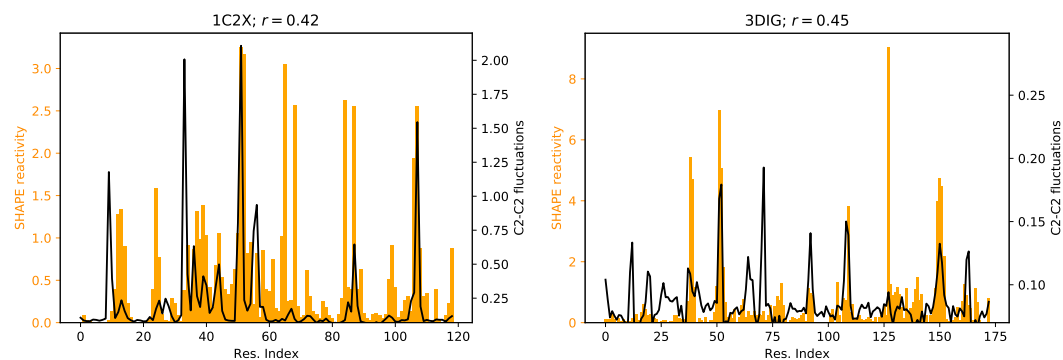

**Figure 5.** C2-C2 fluctuations as predicted by the ENM of Lysine riboswitch (right panel) and 5S rRNA (left panel). SHAPE reactivity data from *Hajdin et al. (2013)* are shown for comparison. Pearson correlation coefficient  $r$  between SHAPE data and ENM-predicted fluctuations is also indicated.

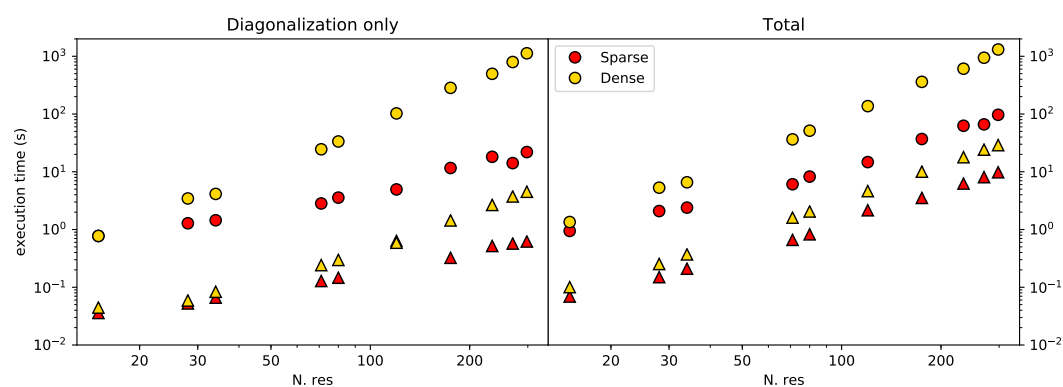

**Figure 6.** Execution time for the ENM calculation using sparse matrices (yellow) or dense matrices (red) on a 2.3 GHz Dual-Core Intel Core i5 processor, as a function of the number of residues in the RNA molecule. Results are shown both for sugar-base-phosphate (SBP) ENM (triangles) and all-atom-ENM (AA-ENM) (circles), as defined in *Pinamonti et al. (2015)*. Left panel shows the time for the interaction matrix diagonalization only, right panel shows the total time including the calculation of C2-C2 fluctuations.

273 ENMs (both SBP and AA) of biomolecules with sizes ranging from a few tens to  
274 several hundreds nucleotides. Calculations were performed running Barnaba on  
275 a personal computer. This, combined with the significant memory saving granted  
276 by sparse matrices representation, makes it possible to easily compute the vi-  
277 brational modes and the local flexibility of large RNA systems such as ribosomal  
278 structures using a limited amount of computer resources.

## 279 Discussion

280 Many RNA molecules are highly dynamical entities that undergo conformational  
281 rearrangements during function. For this reason, it is becoming increasingly im-  
282 portant to develop tools to analyze not only single structures, but also trajectories  
283 (ensembles) obtained from molecular simulations. In this paper we introduce a  
284 software to facilitate the analysis of nucleic acids simulations. The program, called  
285 Barnaba, is available both as a Python library as well as a command line tool. The  
286 output of the program is such that it can be easily used to calculate averages  
287 and probability distributions, or conveniently used as input to the many existing  
288 plotting and analysis libraries (e.g. Matplotlib, SKlearn) available in Python.

289 Barnaba consists of a number of functions: some of them implement standard  
290 calculations (RMSD, torsion angles, base-pairs and base-stacking detection). A  
291 unique feature of Barnaba is the possibility to calculate the eRMSD. This metric  
292 has been successfully employed in several contexts: for analyzing MD simulations  
293 *Kuhrova et al. (2016)*, as a biased collective variable in enhanced sampling simu-  
294 lations *Bottaro et al. (2016)*; *Yang et al. (2017)*; *Poblete et al. (2018)*, to construct  
295 Markov State models *Pinamonti et al. (2017)* and to cluster RNA tetraloop struc-  
296 tures *Bottaro and Lindorff-Larsen (2017)*. In this paper we show the usefulness  
297 of this metric to monitor simulations over time, to perform cluster analysis and to  
298 search for structural motifs within trajectories/structures. This last feature can  
299 be extremely useful to experimental structural biologists, as it makes it possible  
300 to efficiently search for arbitrary query motifs within the entire PDB database.  
301 For analyzing simulations and clusters, we have found it useful to introduce a  
302 dynamic secondary structure representation, that recapitulates the variability of  
303 base-pair and base-stacking interactions within an ensemble.

304 Another unique feature of Barnaba is the possibility to back-calculate  $^3J$  scalar  
305 couplings from structures. This calculation is *per se* extremely simple. However, it  
306 can be difficult to obtain from the literature the different sets of Karplus parame-  
307 ters, and the calculation of the corresponding dihedral angles is error-prone.

308 Finally, Barnaba contains a routine to construct ENMs of nucleic acid and  
309 protein systems and complexes. This is a useful, fast and computationally cheap  
310 tool to predict the local dynamical properties of biomolecules, as well as the chain  
311 flexibility of RNA molecules.

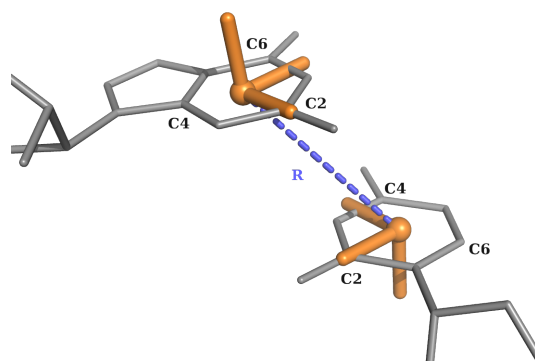

**Figure 7.** Definition of the local coordinate systems and of the vector  $\mathbf{R}$  for purines and pyrimidines.

## 312 **Methods and Materials**

### 313 **Implementation and availability**

314 Barnaba is a Python library and command line tool. It requires Python 2.7  
315 or > 3.3, Numpy, and Scipy libraries. Additionally, Barnaba requires MDTraj  
316 (<http://mdtraj.org/>) for manipulating structures and trajectories. Source code  
317 is freely available at <https://github.com/srnas/barnaba> under GNU GPLv3 license.  
318 The github repository contains documentation as well as a set of examples.

### 319 **Relative position and orientation of nucleobases**

320 For each nucleotide, a local coordinate system is set up in the center of C2, C4, and  
321 C6 atoms. The x-axis points toward the C2 atom, and the y-axis in the direction  
322 of C4 (C/U) or C6 (A/G). The origin of the coordinates of nucleobase  $j$  in the  
323 reference system constructed on base  $i$  is the vector  $\mathbf{R}_{ij} = \{x_{ij}, y_{ij}, z_{ij}\}$ . Note that  
324  $|\mathbf{R}_{ij}| = |\mathbf{R}_{ji}|$  but  $\mathbf{R}_{ij} \neq \mathbf{R}_{ji}$ . The  $\mathbf{R}_{ij}$  is central in the definition of the eRMSD metric  
325 and of the annotation strategy described below.

### 326 **eRMSD**

327 The eRMSD is a contact-map based distance, with the addition of a number of  
328 features that make it suitable for the comparison of nucleic acids structures. We  
329 briefly describe here the procedure, originally introduced in *Bottaro et al. (2014)*.  
330 Given a three-dimensional structure  $\alpha$ , one calculates  $\mathbf{R}_{ij}^\alpha$  for all pairs of bases in a  
331 molecule. The position vectors are then rescaled as follows:

$$\tilde{\mathbf{r}}_{ij}^\alpha = \left( \frac{x_{ij}^\alpha}{a}, \frac{y_{ij}^\alpha}{a}, \frac{z_{ij}^\alpha}{b} \right) \quad (1)$$

332 with  $a = 5\text{\AA}$  and  $b = 3\text{\AA}$ . The rescaling effectively introduces an ellipsoidal anisotropy  
333 that is peculiar to base-base interactions. Given two structures,  $\alpha$  and  $\beta$ , consisting

334 of  $N$  residues, the eRMSD is calculated as

$$eRMSD = \sqrt{\frac{1}{N} \sum_{i,j} |\mathbf{G}(\tilde{\mathbf{r}}_{ij}^{\alpha}) - \mathbf{G}(\tilde{\mathbf{r}}_{ij}^{\beta})|^2} \quad (2)$$

335  $\mathbf{G}$  is a non-linear function of  $\tilde{\mathbf{r}}$  defined as:

$$\mathbf{G}(\tilde{\mathbf{r}}) = \begin{pmatrix} \sin(\gamma\tilde{r}) \frac{\tilde{r}_x}{\tilde{r}} \\ \sin(\gamma\tilde{r}) \frac{\tilde{r}_y}{\tilde{r}} \\ \sin(\gamma\tilde{r}) \frac{\tilde{r}_z}{\tilde{r}} \\ 1 + \cos(\gamma\tilde{r}) \end{pmatrix} \times \frac{\Theta(\tilde{r}_{\text{cutoff}} - \tilde{r})}{\gamma} \quad (3)$$

336 where  $\gamma = \pi/\tilde{r}_{\text{cutoff}}$  and  $\Theta$  is the Heaviside step function. Note that the function  $\mathbf{G}$   
337 has the following desirable properties:

- 338 1.  $|\mathbf{G}(\tilde{\mathbf{r}}^{\alpha}) - \mathbf{G}(\tilde{\mathbf{r}}^{\beta})| \approx |\tilde{\mathbf{r}}^{\alpha} - \tilde{\mathbf{r}}^{\beta}|$  if  $\tilde{r}^{\alpha}, \tilde{r}^{\beta} \ll \tilde{r}_{\text{cutoff}}$ .
- 339 2.  $|\mathbf{G}(\tilde{\mathbf{r}}^{\alpha}) - \mathbf{G}(\tilde{\mathbf{r}}^{\beta})| = 0$  if  $\tilde{r}^{\alpha}, \tilde{r}^{\beta} \geq \tilde{r}_{\text{cutoff}}$ .
- 340 3.  $\mathbf{G}(\tilde{\mathbf{r}})$  is a continuous function.

341 The cutoff value is set to  $\tilde{r}_{\text{cutoff}} = 2.4$ .

### 342 Annotation

343 A pair of bases  $i$  and  $j$  is considered for annotation only if  $|\tilde{\mathbf{r}}_{ij}| < 1.7$  and  $|\tilde{\mathbf{r}}_{ji}| < 1.7$ .

344 **Stacking.** The criteria for base-stacking are the following:

$$(|z_{ij}| \text{ and } |z_{ji}| > 2\text{\AA}) \text{ and } (\rho_{ij} \text{ or } \rho_{ji} < 2.5\text{\AA}) \text{ and } (|\theta_{ij}| < 40^{\circ}) \quad (4)$$

345 Here,  $\rho_{ij} = \sqrt{x_{ij}^2 + y_{ij}^2}$  and  $\theta_{ij}$  is the angle between the vectors normal to the  
346 planes of the two bases. Similarly to other annotation approaches **Gendron et al.**  
347 **(2001)**; **Sarver et al. (2008)**; **Waleń et al. (2014)**, we identify four different classes  
348 of stacking interactions according to the sign of the  $z$  coordinates:

- 349 • upward: ( $>>$  or 3'-5') if  $z_{ij} > 0$  and  $z_{ji} < 0$
- 350 • downward: ( $<<$  or 5'-3') if  $z_{ij} < 0$  and  $z_{ji} > 0$
- 351 • outward: ( $<>$  or 5'-5') if  $z_{ij} < 0$  and  $z_{ji} < 0$
- 352 • inward: ( $><$  or 3'-3') if  $z_{ij} > 0$  and  $z_{ji} > 0$

353 We notice that, with this choice, consecutive base pairs with alternating purines  
354 and pyrimidines result in a cross-strand outward stacking (see, e.g., Figure 1A).

355 **Base-pairing.** Base-pairs are classified according to the Leontis-Westhof  
356 nomenclature **Leontis and Westhof (2001)**, based on the observation that hy-  
357 drogen bonding between RNA bases involve three distinct edges: Watson-Crick  
358 (W), Hoogsteen edge (H), and sugar (S). An additional distinction is made accord-  
359 ing to the orientation with respect to the glycosydic bonds, in cis (c) or trans (t)  
360 orientation.

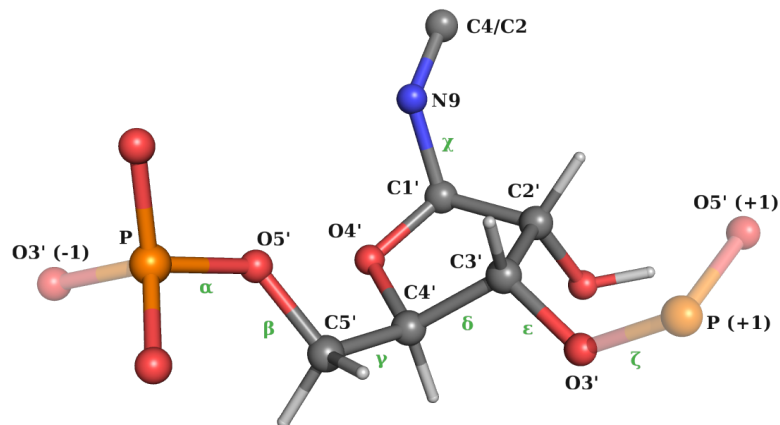

**Figure 8.** Definition of the backbone/glycosidic angles  $\chi$  *Frellsen et al. (2009)*.

361 In Barnaba, all non-stacked bases are considered base-paired if  $|\theta_{ij}| < 60^\circ$   
362 and there exists at least one hydrogen bond, calculated as the number of donor-  
363 acceptor pairs with distance  $< 3.3\text{\AA}$ . Edges are defined according to the value of  
364 the angle  $\psi = \arctan 2(\hat{y}_{ij}, \hat{x}_{ij})$ .

- 365 • Watson-Crick edge (W):  $0.16 < \psi \leq 2.0\text{rad}$
- 366 • Hoogsteen edge (H):  $2.0 < \psi \leq 4.0\text{rad}$ .
- 367 • Sugar edge (S):  $\psi > 4.0\text{rad}, \psi \leq 0.16\text{rad}$

368 These threshold values are obtained by considering the empirical distribution  
369 of base-base interactions shown in Figure 2 in *Bottaro et al. (2014)*. Cis/trans  
370 orientation is calculated according to the value of the dihedral angle defined by  
371  $C1'_i - N1/N9_i - N1/N9_j - C1'_j$ , where N1/N9 is used for pyrimidines and purines,  
372 respectively.

373 We note that the annotation provided by Barnaba might fail in detecting some  
374 interactions, and sometimes differs from other programs. This is due to the fact  
375 that for non-Watson-Crick and stacking interactions it is not trivial to define a  
376 set of criteria for a rigorous discrete classification *Waleń et al. (2014)*. Typically,  
377 these criteria are calibrated to work well for high-resolution structures, but they  
378 are not always suitable to describe nearly-formed interactions often observed in  
379 molecular simulations.

### 380 Torsion angles and $^3J$ scalar couplings

381 We use the standard definition of backbone angles, glycosidic  $\chi$  angle (O4'-C1'-  
382 N9-C4 atoms for A/G, O4'-C1'-N1-C2 for C/U) and sugar torsion angles ( $v_0 \dots v_4$ ) as  
383 shown in Figures 8 and 9 *Saenger (2013)*. Pseudorotation sugar parameters am-  
384 plitude  $t_m$  and phase  $P$  are calculated as described in *Altona and Sundaralingam*



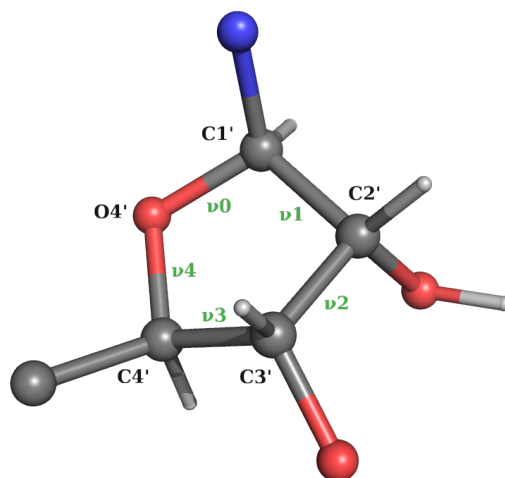

**Figure 9.** Definition of pucker angles  $\nu_0 \dots \nu_4$

385 (1972)

$$P0 = \arctan2(\nu_4 + \nu_1 - \nu_3 - \nu_0, 3.0777\nu_2) \quad (5)$$

$$tm = \nu_2 P0 \quad (6)$$

$$P = \frac{180}{\pi} P0 \quad (7)$$

386  $^3J$  Scalar couplings are calculated using the Karplus equations

$$A \cos^2(\theta + \phi) + B \cos(\theta + \phi) + C \quad (8)$$

387 Karplus parameters relative to the different scalar couplings are reported in Table  
388 1.

### 389 Elastic Network Model

390 In ENMs, a set of  $N$  beads connected by pairwise harmonic springs penalize  
391 deviations of inter-bead distances from their reference values. Spring constants  
392 are set to a constant value  $k$  whenever the reference distance between the two  
393 beads is smaller than an interaction cutoff ( $R_c$ ), and set to zero otherwise. Under  
394 these assumptions, the potential energy of the system can be approximated as

$$U(\delta r_{i,\mu}, \delta r_{j,\nu}) = \delta r_{i,\mu} \mathbf{M}_{ij,\mu\nu} \delta r_{j,\nu} \quad (9)$$

395 where  $\mathbf{M}$  is the symmetric  $3N \times 3N$  interaction matrix, and  $\delta \mathbf{r}_i$  is the deviation of  
396 bead  $i$  from its position in the reference structure.

397 The user can select different atoms to be used as beads in the construction  
398 of the model. The optimal value of the parameter  $R_c$  depends on this choice, as  
399 described in Ref. *Pinamonti et al. (2015)*.

**Table 1.** Karplus parameters used in Barnaba

| Name      | $\theta$        | A [Hz] | B [Hz] | C [Hz] | $\phi$ [rad] | Ref                            |
|-----------|-----------------|--------|--------|--------|--------------|--------------------------------|
| H1'-H2'   | H1'-C1'-C2'-H2' | 9.67   | -2.03  | 0      | 0            | <i>Condon et al. (2015)</i>    |
| H2'-H3'   | H2'-C2'-C3'-H3' | 9.67   | -2.03  | 0      | 0            | <i>Condon et al. (2015)</i>    |
| H3'-H4'   | H3'-C3'-C4'-H4' | 9.67   | -2.03  | 0      | 0            | <i>Condon et al. (2015)</i>    |
| H5'-P     | $\beta$         | 15.3   | -6.1   | 1.6    | $-2/3\pi$    | <i>Lankhorst et al. (1984)</i> |
| H5''-P    | $\beta$         | 15.3   | -6.1   | 1.6    | $2/3\pi$     | <i>Lankhorst et al. (1984)</i> |
| C4-P      | $\beta$         | 6.9    | -3.4   | 0.7    | 0.0          | <i>Marino et al. (1999)</i>    |
| H4'-H5'   | $\gamma$        | 9.7    | -1.8   | 0.0    | $-2/3\pi$    | <i>Davies (1978)</i>           |
| H4'-H5''  | $\gamma$        | 9.7    | -1.8   | 0.0    | 0.0          | <i>Davies (1978)</i>           |
| H3-P(+1)  | $\epsilon$      | 15.3   | -6.1   | 1.6    | $2/3\pi$     | <i>Lankhorst et al. (1984)</i> |
| C4-P(+1)  | $\epsilon$      | 6.9    | -3.4   | 0.7    | 0.0          | <i>Marino et al. (1999)</i>    |
| H1'-C8/C6 | $\chi$          | 4.5    | -0.6   | 0.1    | $-\pi/3$     | <i>Ippel et al. (1996)</i>     |
| H1'-C4/C2 | $\chi$          | 4.7    | 2.3    | 0.1    | $-\pi/3$     | <i>Ippel et al. (1996)</i>     |

400 The covariance matrix is computed as

$$C_{ij,\mu\nu} = \sum_{\alpha=6}^{3N} \frac{1}{\lambda_{\alpha}} v_{i,\mu}^{\alpha} v_{j,\nu}^{\alpha} \quad (10)$$

401 Where  $\lambda_{\alpha}$  and  $v^{\alpha}$  are the eigenvalues and the eigenvectors of the interaction matrix  
402  $M$ , respectively. The sum on  $\alpha$  runs over all non-null modes of the system.

403 Mean square fluctuation (MSF) of residue  $i$  is calculated as:

$$\text{MSF}_i = \langle \delta r_i^2 \rangle = \sum_{\mu=1}^3 C_{ii,\mu\mu} \quad (11)$$

404 The variance of the distance between two beads can be directly obtained from  
405 the covariance matrix in the linear perturbation regime as

$$\sigma_{d_{ij}}^2 = \sum_{\mu,\nu=1}^3 \frac{\tilde{d}_{ij}^{\mu} \tilde{d}_{ij}^{\nu}}{\tilde{d}^2} (C_{ii,\mu\nu} + C_{jj,\mu\nu} - C_{ij,\mu\nu} - C_{ji,\mu\nu}) \quad (12)$$

406 where  $\tilde{d}_{ij}^{\mu}$  is the  $\mu$  Cartesian component of the reference distance between bead  $i$   
407 and  $j$ .

408 For most practical applications of ENMs only the high-amplitude modes, i.e.  
409 those with the smallest eigenvalues, provide interesting dynamical information.  
410 The calculation of C2-C2 distance fluctuations using Eq. 12 requires the knowledge  
411 of all eigenvectors. This can be performed by reducing the system to the "effective  
412 interaction matrix"  $M_{C2}^{\text{eff}}$  relative to the beads of interest *Zen et al. (2008)*.

$$M = \left( \begin{array}{c|c} M_{C2} & W \\ \hline W^T & M_{\text{other}} \end{array} \right) \quad (13)$$

413 Where  $M_{C2}$  ( $M_{\text{other}}$ ) is formed by the rows and columns of  $M$  relative to the (non)  
414 C2 beads, while  $W$  represent the interactions between C2 and non-C2 beads. The  
415 effective interaction matrix is defined as

$$M_{C2}^{\text{eff}} = M_{C2} - W M_{\text{other}}^{-1} W^T \quad (14)$$

416 This can be computed efficiently using sparse matrix-vector multiplication algo-  
417 rithms. The resulting effective matrix  $M_{C2}^{\text{eff}}$  has reduced size (1/3 for SBP-ENM,  
418 1/20 for AA-ENM) making its pseudo-inversion considerably faster. Note that, in  
419 case one is interested in computing the C2-C2 fluctuations for a portion of the  
420 molecule only, the algorithm could be further optimized by directly computing  
421 the effective interactions matrix associated to the required C2-C2 pairs.

## 422 Acknowledgments

423 We thank D.E Shaw Research for providing the simulation of the UUCG tetraloop.  
424 The research is funded by a grant from The Velux Foundations (S.B. and K.L.-  
425 L.), a Hallas-Møller Stipend from the Novo Nordisk Foundation (K.L.-L.), and the  
426 Lundbeck Foundation BRAINSTRUC initiative (K.L.-L.). G.B., S.R, S.B and G.P. have  
427 received funding from the European Research Council (ERC) under the European  
428 Union's Seventh Framework Programme (FP/2007-2013)/ERC grant agreement  
429 no. 306662 (S-RNA-S). W.B. is funded from VILLUM FONDEN (VKR023445) and the  
430 Danish Council for Independent Research (DFF-4181-00344).

## 431 References

- 432 **Abraham MJ**, Murtola T, Schulz R, Páll S, Smith JC, Hess B, Lindahl E. GROMACS: High  
433 performance molecular simulations through multi-level parallelism from laptops to  
434 supercomputers. *SoftwareX*. 2015; 1:19–25.
- 435 **Altona Ct**, Sundaralingam M. Conformational analysis of the sugar ring in nucleosides  
436 and nucleotides. New description using the concept of pseudorotation. *Journal of the*  
437 *American Chemical Society*. 1972; 94(23):8205–8212.
- 438 **Bahar I**, Jernigan RL. Vibrational dynamics of transfer RNAs: comparison of the free and  
439 synthetase-bound forms. *The Journal of Molecular Biology*. 1998; 281(5):871–884.
- 440 **Bottaro S**, Banas P, Sponer J, Bussi G. Free Energy Landscape of GAGA and UUCG RNA  
441 Tetraloops. *J Phys Chem Lett*. 2016; 7(20):4032–4038.
- 442 **Bottaro S**, Bussi G, Kennedy SD, Turner DH, Lindorff-Larsen K. Conformational ensembles  
443 of RNA oligonucleotides from integrating NMR and molecular simulations. *Science*  
444 *Advances*. 2018; 4(5):eaar8521.
- 445 **Bottaro S**, Di Palma F, Bussi G. The role of nucleobase interactions in RNA structure and  
446 dynamics. *Nucleic Acids Res*. 2014; 42(21):13306–13314.

- 447 **Bottaro S**, Lindorff-Larsen K. Mapping the universe of RNA tetraloop folds. *Biophys J.*  
448 2017; 113(2):257–267.
- 449 **Chen H**, Meisburger SP, Pabit SA, Sutton JL, Webb WW, Pollack L. Ionic strength-dependent  
450 persistence lengths of single-stranded RNA and DNA. *Proceedings of the National*  
451 *Academy of Sciences.* 2012; 109(3):799–804.
- 452 **Condon DE**, Kennedy SD, Mort BC, Kierzek R, Yildirim I, Turner DH. Stacking in RNA:  
453 NMR of four tetramers benchmark molecular dynamics. *J Chem Theor Comput.* 2015;  
454 11(6):2729–2742.
- 455 **Davies DB.** Conformations of nucleosides and nucleotides. *Prog Nucl Magn Reson*  
456 *Spectrosc.* 1978; 12(3):135–225.
- 457 **Dawson WK**, Bujnicki JM. Computational modeling of RNA 3D structures and interactions.  
458 *Current opinion in structural biology.* 2016; 37:22–28.
- 459 **Dickerson R.** Definitions and nomenclature of nucleic acid structure components. *Nucleic*  
460 *acids research.* 1989; 17(5):1797–1803.
- 461 **Ester M**, Kriegel HP, Sander J, Xu X, et al. A density-based algorithm for discovering clusters  
462 in large spatial databases with noise. In: *Kdd*, vol. 96; 1996. p. 226–231.
- 463 **Frellsen J**, Moltke I, Thiim M, Mardia K, Ferkinghoff-Borg J, Hamelryck T. A Probabilistic  
464 Model of RNA Conformational Space. *PLoS Comput Biol.* 2009; 5(3):e1000406.
- 465 **Gendron P**, Lemieux S, Major F. Quantitative analysis of nucleic acid three-dimensional  
466 structures. *Journal of molecular biology.* 2001; 308(5):919–936.
- 467 **Górska A**, Jasiński M, Trylska J. MINT: software to identify motifs and short-range interac-  
468 tions in trajectories of nucleic acids. *Nucleic acids research.* 2015; 43(17):e114–e114.
- 469 **Hajdin CE**, Bellaousov S, Huggins W, Leonard CW, Mathews DH, Weeks KM. Accurate  
470 SHAPE-directed RNA secondary structure modeling, including pseudoknots. *Proc Natl*  
471 *Acad Sci.* 2013; 110(14):5498–5503.
- 472 **Ippel J**, Wijmenga S, De Jong R, Heus H, Hilbers C, De Vroom E, Van der Marel G, Van Boom  
473 J. Heteronuclear scalar couplings in the bases and sugar rings of nucleic acids: their  
474 determination and application in assignment and conformational analysis. *Magn Reson*  
475 *Chem.* 1996; 34(13):S156–S176.
- 476 **Jacobson AB**, Zuker M. Structural analysis by energy dot plot of a large mRNA. *Journal of*  
477 *molecular biology.* 1993; 233(2):261–269.
- 478 **Kabsch W.** A solution for the best rotation to relate two sets of vectors. *Acta Crystallo-*  
479 *graphica Section A: Crystal Physics, Diffraction, Theoretical and General Crystallography.*  
480 1976; 32(5):922–923.
- 481 **Kuhrova P**, Best RB, Bottaro S, Bussi G, Sponer J, Otyepka M, Banas P. Computer folding  
482 of RNA tetraloops: identification of key force field deficiencies. *Journal of chemical*  
483 *theory and computation.* 2016; 12(9):4534–4548.

- 484 **Kumar R**, Grubmüller H. do\_x3dna: a tool to analyze structural fluctuations of dsDNA or  
485 dsRNA from molecular dynamics simulations. *Bioinformatics*. 2015; 31(15):2583–2585.
- 486 **Lankhorst PP**, Haasnoot CA, Erkelens C, Altona C. Carbon-13 NMR in conformational  
487 analysis of nucleic acid fragments 2. A reparametrization of the Karplus equation for  
488 vicinal NMR coupling constants in CCOP and HCOP fragments. *J Biomol Struct Dyn*.  
489 1984; 1(6):1387–1405.
- 490 **Lavery R**, Moakher M, Maddocks JH, Petkeviciute D, Zakrzewska K. Conformational  
491 analysis of nucleic acids revisited: Curves+. *Nucleic acids research*. 2009; 37(17):5917–  
492 5929.
- 493 **Lemieux S**, Major F. RNA canonical and non-canonical base pairing types: a recognition  
494 method and complete repertoire. *Nucleic acids research*. 2002; 30(19):4250–4263.
- 495 **Leontis NB**, Westhof E. Geometric nomenclature and classification of RNA base pairs.  
496 *Rna*. 2001; 7(4):499–512.
- 497 **Lu XJ**, Bussemaker HJ, Olson WK. DSSR: an integrated software tool for dissecting the  
498 spatial structure of RNA. *Nucleic acids research*. 2015; 43(21):e142–e142.
- 499 **Lu XJ**, Olson WK. 3DNA: a versatile, integrated software system for the analysis, rebuilding  
500 and visualization of three-dimensional nucleic-acid structures. *Nature protocols*. 2008;  
501 3(7):1213–1227.
- 502 **Marino JP**, Schwalbe H, Griesinger C. J-coupling restraints in RNA structure determination.  
503 *Acc Chem Res*. 1999; 32(7):614–623.
- 504 **McGibbon RT**, Beauchamp KA, Harrigan MP, Klein C, Swails JM, Hernández CX, Schwantes  
505 CR, Wang LP, Lane TJ, Pande VS. MDTraj: A Modern Open Library for the Analysis of  
506 Molecular Dynamics Trajectories. *Biophysical Journal*. 2015; 109(8):1528 – 1532. doi:  
507 [10.1016/j.bpj.2015.08.015](https://doi.org/10.1016/j.bpj.2015.08.015).
- 508 **Merino EJ**, Wilkinson KA, Coughlan JL, Weeks KM. RNA structure analysis at single nu-  
509 cleotide resolution by selective 2'-hydroxyl acylation and primer extension (SHAPE).  
510 *Journal of the American Chemical Society*. 2005; 127(12):4223–4231.
- 511 **Miao Z**, Adamiak RW, Antczak M, Batey RT, Becka AJ, Biesiada M, Boniecki MJ, Bujnicki JM,  
512 Chen SJ, Cheng CY, et al. RNA-Puzzles Round III: 3D RNA structure prediction of five  
513 riboswitches and one ribozyme. *RNA*. 2017; 23(5):655–672.
- 514 **Michaud-Agrawal N**, Denning EJ, Woolf TB, Beckstein O. MDAnalysis: a toolkit for the  
515 analysis of molecular dynamics simulations. *Journal of computational chemistry*. 2011;  
516 32(10):2319–2327.
- 517 **Nozinovic S**, Fürtig B, Jonker HR, Richter C, Schwalbe H. High-resolution NMR structure of  
518 an RNA model system: the 14-mer cUUCGg tetraloop hairpin RNA. *Nucleic Acids Res*.  
519 2010; 38(2):683–694.
- 520 **Parisien M**, Cruz JA, Westhof É, Major F. New metrics for comparing and assessing  
521 discrepancies between RNA 3D structures and models. *Rna*. 2009; 15(10):1875–1885.

- 522 **Pinamonti G**, Bottaro S, Micheletti C, Bussi G. Elastic network models for RNA: a com-  
523 parative assessment with molecular dynamics and SHAPE experiments. *Nucleic acids*  
524 *research*. 2015; 43(15):7260–7269.
- 525 **Pinamonti G**, Zhao J, Condon DE, Paul F, Noé F, Turner DH, Bussi G. Predicting the kinetics  
526 of RNA oligonucleotides using Markov state models. *Journal of chemical theory and*  
527 *computation*. 2017; 13(2):926–934.
- 528 **Poblete S**, Bottaro S, Bussi G. A nucleobase-centered coarse-grained representation for  
529 structure prediction of RNA motifs. *Nucleic Acids Research*. 2018; 46:1674.
- 530 **Richardson JS**, Schneider B, Murray LW, Kapral GJ, Immormino RM, Headd JJ, Richardson  
531 DC, Ham D, Hershkovits E, Williams LD, et al. RNA backbone: consensus all-angle con-  
532 formers and modular string nomenclature (an RNA Ontology Consortium contribution).  
533 *Rna*. 2008; 14(3):465–481.
- 534 **Roe DR**, Cheatham III TE. PTRAJ and CPPTRAJ: software for processing and analysis of  
535 molecular dynamics trajectory data. *Journal of chemical theory and computation*. 2013;  
536 9(7):3084–3095.
- 537 **Saenger W**. Principles of nucleic acid structure. Springer Science & Business Media; 2013.
- 538 **Sarver M**, Zirbel CL, Stombaugh J, Mokdad A, Leontis NB. FR3D: finding local and compos-  
539 ite recurrent structural motifs in RNA 3D structures. *Journal of mathematical biology*.  
540 2008; 56(1-2):215–252.
- 541 **Setny P**, Zacharias M. Elastic Network Models of Nucleic Acids Flexibility. *Journal of*  
542 *Chemical Theory and Computation*. 2013; 9(12):5460–5470.
- 543 **Šponer J**, Bussi G, Krepl M, Banáš P, Bottaro S, Cunha RA, Gil-Ley A, Pinamonti G, Poblete  
544 S, Jurečka P, Walter NG, Otyepka M. RNA Structural Dynamics As Captured by Molecular  
545 Simulations: A Comprehensive Overview. *Chem Rev*. 2018; 118:4177.
- 546 **Tan D**, Piana S, Dirks RM, Shaw DE. RNA force field with accuracy comparable to state-of-  
547 the-art protein force fields. *Proceedings of the National Academy of Sciences*. 2018; p.  
548 201713027.
- 549 **Tiberti M**, Papaleo E, Bengtsen T, Boomsma W, Lindorff-Larsen K. ENCORE: soft-  
550 ware for quantitative ensemble comparison. *PLoS computational biology*. 2015;  
551 11(10):e1004415.
- 552 **Tirion MM**. Large amplitude elastic motions in proteins from a single-parameter, atomic  
553 analysis. *Phys Rev Lett*. 1996; 77(9):1905.
- 554 **Tribello GA**, Bonomi M, Branduardi D, Camilloni C, Bussi G. PLUMED 2: New feathers for  
555 an old bird. *Computer Physics Communications*. 2014; 185(2):604–613.
- 556 **Waleń T**, Chojnowski G, Gierski P, Bujnicki JM. ClaRNA: a classifier of contacts in RNA 3D  
557 structures based on a comparative analysis of various classification schemes. *Nucleic*  
558 *acids research*. 2014; 42(19):e151–e151.

- 559 **Yang C**, Lim M, Kim E, Pak Y. Predicting RNA structures via a simple van der Waals  
560 correction to an all-atom force field. *Journal of chemical theory and computation*. 2017;  
561 13(2):395–399.
- 562 **Zen A**, Carnevale V, Lesk AM, Micheletti C. Correspondences between low-energy modes  
563 in enzymes: Dynamics-based alignment of enzymatic functional families. *Protein*  
564 *Science*. 2008; 17(5):918–929.
- 565 **Zimmermann MT**, Jernigan RL. Elastic network models capture the motions apparent  
566 within ensembles of RNA structures. *RNA*. 2014; 20(6):792–804.
